# Supplementary material
Source: Springer Nature journal article supplement (https://www.springermedizin.de/resource/supplementary/13075_2012_3679_MOESM5_ESM.pdf/9695082)

○ MINIMAL PRACTICE    △ PRACTICE AS PER PROTOCOL

A. NRS-PI

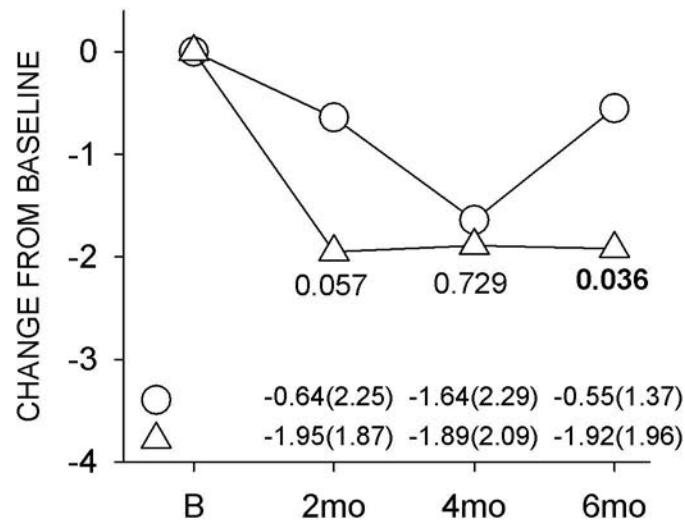

B. FIQ

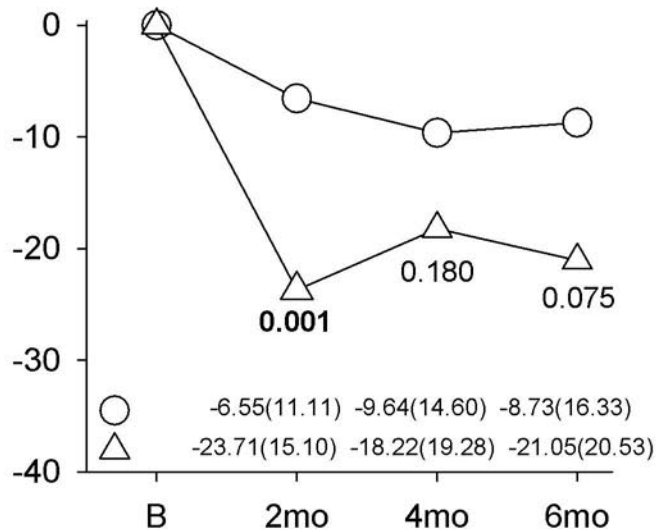

C. PSQI

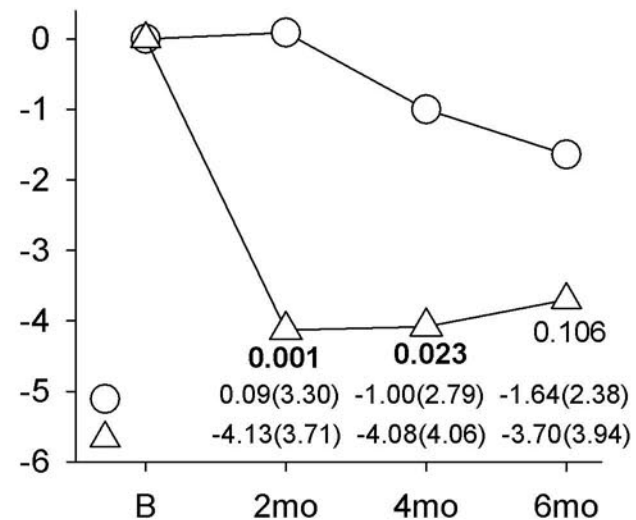

D. SF-36 physical

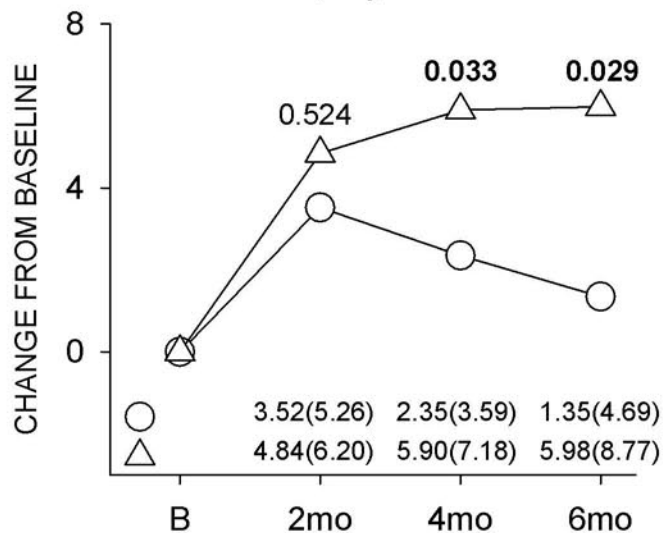

E. SF-36 mental

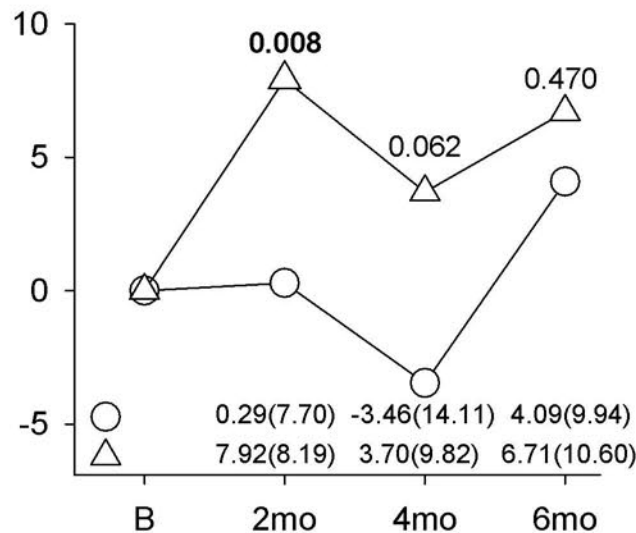

Supplement: MOESM5 [file 9695082]
